# Supplementary material for: Projections of Beach Erosion and Associated Costs in Chile
Source: MDPI journal article supplement (doi:10.3390/su15075883), 2023-03-28
Supplement: s1 [file s1]

Archive with 1 entries (1 files):
- sustainability-2234850-supplementary.pdf
